# Supplementary material for: Zika virus-induced TNF-α signaling dysregulates expression of neurologic genes associated with psychiatric disorders
Source: Springer Nature journal article supplement (doi:10.1186/s12974-022-02460-8), 2022-04-24
Supplement: MOESM1 [file 20339450]

Additional File 1

Table S1  
**Primer Sequences for qRT-PCR**

| <b>Gene</b>    | <b>Direction</b> | <b>Sequence</b>                |
|----------------|------------------|--------------------------------|
| <i>Adora2a</i> | Forward          | CACGCAGAGTTCCATCTTCAGC         |
| <i>Adora2a</i> | Reverse          | CCCAGCAAATCGCAATGATGCC         |
| <i>Aldh1a2</i> | Forward          | CACAAGACACGAGCCCATTGGA         |
| <i>Aldh1a2</i> | Reverse          | GGTTTGATGACCACGGTGTACC         |
| <i>Cacna1e</i> | Forward          | ATGGACAAGGCTACCACGGAGA         |
| <i>Cacna1e</i> | Reverse          | GACTGGCTTCTCCATCCGTCTT         |
| <i>Ccl12</i>   | Forward          | GCTACAGGAGAATCACAAGCAGC        |
| <i>Ccl12</i>   | Reverse          | ACGTCTTATCCAAGTGGTTTATGG       |
| <i>Ccl2</i>    | Forward          | TGGCTCAGCCAGATGCAGT            |
| <i>Ccl2</i>    | Reverse          | TTGGGATCATCTTGCTGGTG           |
| <i>Ccl5</i>    | Forward          | CCTGCTGCTTTGCCTACCTCTC         |
| <i>Ccl5</i>    | Reverse          | ACACACTTGCGGTTCTTCGA           |
| <i>Cd69</i>    | Forward          | TTTGGAGGGGTTTCAGTGGT           |
| <i>Cd69</i>    | Reverse          | GCTGTCTACACGGAGGAAGT           |
| <i>Chac1</i>   | Forward          | TGACCCTCCTGAAGACCGTGA          |
| <i>Chac1</i>   | Reverse          | AGTGTCATAGCCACCAAGCACG         |
| <i>Cpne6</i>   | Forward          | TCAGCTTCACGGTGGCTATCGA         |
| <i>Cpne6</i>   | Reverse          | CTGTCATAGTCCTGGCAGATACC        |
| <i>Dpp6</i>    | Forward          | CAATCCTGACCCTCTGTGATGC         |
| <i>Dpp6</i>    | Reverse          | GCCATCTTTGGAGAACACAGGC         |
| <i>Gpr84</i>   | Forward          | AAGCCTTCCAGAAGTGCATCGC         |
| <i>Gpr84</i>   | Reverse          | CAGAGGAACACTGCGAAGCACA         |
| <i>Icam1</i>   | Forward          | AAACCAGACCCTGGAAGTGCAC         |
| <i>Icam1</i>   | Reverse          | GCCTGGCATTTCAGAGTCTGCT         |
| <i>Ifna6</i>   | Forward          | CTTCCACAGGATCACTGTGTACCT       |
| <i>Ifna6</i>   | Reverse          | TTCTGCTCTGACCACCTCCC           |
| <i>Ifnb</i>    | Forward          | CTGGAGCAGCTGAATGGAAAG          |
| <i>Ifnb</i>    | Reverse          | CTT CTC CGT CAT CTC CAT AGG G  |
| <i>Ifng</i>    | Forward          | AACGCTACACACTGCATCTTGG         |
| <i>Ifng</i>    | Reverse          | GCCGTGGCAGTAACAGCC             |
| <i>Il1b</i>    | Forward          | ACCTGTCCTGTGTAATGAAAGACG       |
| <i>Il1b</i>    | Reverse          | TGGGTATTGCTTGGGATCCA           |
| <i>Il6</i>     | Forward          | CAGAATTGCCATCGTACAACCTTTTTCTCA |
| <i>Il6</i>     | Reverse          | AAGGTCATCATCGTTGTTCATACA       |
| <i>Itgb3</i>   | Forward          | GTGAGTGCGATGACTTCTCCTG         |
| <i>Itgb3</i>   | Reverse          | CAGGTGTCAGTGCGTGTAGTAC         |

|                 |         |                            |
|-----------------|---------|----------------------------|
| <i>Lepr</i>     | Forward | CTTTCCTGTGGACAGAACCAGC     |
| <i>Lepr</i>     | Reverse | AGCACTGAGTGA CTCCACAGCA    |
| <i>Lhx6</i>     | Forward | AGAGAAAGCACCTCCAGAA        |
| <i>Lhx6</i>     | Reverse | TGGAGTTCTGAACCAAACCA       |
| <i>Met</i>      | Forward | GTTCTGCTTGGCAACGAGAGCT     |
| <i>Met</i>      | Reverse | GGAGAATGCACTGTATTGCGTCG    |
| <i>Myt1l</i>    | Forward | TGTCTGGATGCCCGCACAAAGA     |
| <i>Myt1l</i>    | Reverse | CTTCTGTGCGAGTTCCTGTTGC     |
| <i>Nlgn1</i>    | Forward | TGATGGGAGTGTCTTGGCAAGC     |
| <i>Nlgn1</i>    | Reverse | CCGTAGTTTCCTTTGGCAGCCT     |
| <i>Nr4a2</i>    | Forward | GCATACAGGTCCAACCCAGT       |
| <i>Nr4a2</i>    | Reverse | AATGCAGGAGAAGGCAGAAA       |
| <i>Penk</i>     | Forward | TGCAGCCAGGACTGCGCTAAAT     |
| <i>Penk</i>     | Reverse | GATCCTTGCAGGTCTCCAGAT      |
| <i>Pmch</i>     | Forward | CTCTGGAACAATACAAAAACGACG   |
| <i>Pmch</i>     | Reverse | GGTTTTACAGCCAGACTCAGTGG    |
| <i>Parb</i>     | Forward | GCTTCGTTTGCCAGGACAAGTC     |
| <i>Parb</i>     | Reverse | TGGCATCGGTTTCTAGTGACCT     |
| <i>Stat1</i>    | Forward | GAACGCGCTCTGCTCAA          |
| <i>Stat1</i>    | Reverse | TGCGAATAATATCTGGGAAAGTAA   |
| <i>Syn3</i>     | Forward | CCATCTCTGGAAACTGGAAGGC     |
| <i>Syn3</i>     | Reverse | CGCCGAACATTTCTGAGCAGCT     |
| <i>Tac1</i>     | Forward | TAATGGGCAAGCGGGATGCTGA     |
| <i>Tac1</i>     | Reverse | CCATTAGTCCAACAAAGGAATCTG   |
| <i>Tnfa</i>     | Forward | AAAATTTCGAGTGACAAGCCTGTAGC |
| <i>Tnfa</i>     | Reverse | GTGGGTGAGGAGCACGTAG        |
| <i>Tnfrsf1a</i> | Forward | ACGAATCACTCTGCTCCGTG       |
| <i>Tnfrsf1a</i> | Reverse | TCGCAAGGTCTGCATTGTCA       |
| <i>Tnfrsf1b</i> | Forward | GAGATGCCAAGGTGCCTCAT       |
| <i>Tnfrsf1b</i> | Reverse | AACTGGGTGCTGTGGTCAAC       |
| <i>Tor3a</i>    | Forward | GGTGCCTATGTCTCAGCCTCTT     |
| <i>Tor3a</i>    | Reverse | GCCATAGA ACTGATGAGAGGGAG   |

Table S2  
Curated Psychiatric Disorder-Associated Gene List

| Schizophrenia | Bipolar Disorder | Major Depressive Disorder | ADHD | Autism Spectrum Disorder | Implicated gene | Reference(s)                                       |
|---------------|------------------|---------------------------|------|--------------------------|-----------------|----------------------------------------------------|
|               |                  |                           | X    |                          | <i>5HT1B</i>    | (Hawi et al., 2005)                                |
|               |                  | X                         |      |                          | <i>5HTT</i>     | (Lohoff, 2010)                                     |
|               |                  |                           |      | X                        | <i>ACHE</i>     | (Abrahams et al., 2013)                            |
|               |                  |                           | X    | X                        | <i>ACTB</i>     | (Mill et al., 2005), (Zamanian Azodi et al., 2019) |
|               |                  |                           |      | X                        | <i>ACTL6B</i>   | (Abrahams et al., 2013)                            |
|               |                  |                           |      | X                        | <i>ACY1</i>     | (Abrahams et al., 2013)                            |
|               |                  |                           |      | X                        | <i>ADA</i>      | (Abrahams et al., 2013)                            |
|               | X                |                           |      |                          | <i>ADCY2</i>    | (Mühleisen et al., 2014)                           |
|               |                  |                           |      | X                        | <i>ADCY3</i>    | (Abrahams et al., 2013)                            |
|               |                  |                           |      | X                        | <i>ADNP</i>     | (Abrahams et al., 2013)                            |
|               |                  |                           | X    |                          | <i>ADRA1A</i>   | (Hayman and Fernandez, 2018)                       |
|               |                  |                           | X    |                          | <i>ADRA1B</i>   | (Hayman and Fernandez, 2018)                       |
|               |                  |                           |      | X                        | <i>ADSL</i>     | (Abrahams et al., 2013)                            |
|               |                  |                           |      | X                        | <i>AFF2</i>     | (Abrahams et al., 2013)                            |
|               |                  |                           |      | X                        | <i>AGAP2</i>    | (Abrahams et al., 2013)                            |
|               |                  |                           |      | X                        | <i>AGO1</i>     | (Abrahams et al., 2013)                            |
|               |                  |                           |      | X                        | <i>AGO2</i>     | (Abrahams et al., 2013)                            |
|               |                  |                           |      | X                        | <i>AGO4</i>     | (Abrahams et al., 2013)                            |
|               |                  |                           |      | X                        | <i>AHDC1</i>    | (Abrahams et al., 2013)                            |
|               |                  |                           |      | X                        | <i>AHI1</i>     | (Abrahams et al., 2013)                            |
|               |                  |                           |      | X                        | <i>AHNAK</i>    | (Abrahams et al., 2013)                            |
|               |                  |                           |      | X                        | <i>AKAP9</i>    | (Abrahams et al., 2013)                            |
|               |                  |                           |      | X                        | <i>ALDH1A3</i>  | (Abrahams et al., 2013)                            |
|               |                  |                           |      | X                        | <i>ALDH5A1</i>  | (Abrahams et al., 2013)                            |
| X             |                  |                           |      |                          | <i>ALDOA</i>    | (Schmidt-Kastner et al., 2020)                     |
|               |                  |                           |      | X                        | <i>ALG6</i>     | (Abrahams et al., 2013)                            |
| X             |                  |                           |      |                          | <i>ALPK3</i>    | (Schmidt-Kastner et al., 2020)                     |
|               |                  |                           |      | X                        | <i>AMPD1</i>    | (Abrahams et al., 2013)                            |
|               | X                |                           |      |                          | <i>AMPD3</i>    | (Huang et al., 2010)                               |
|               |                  |                           |      | X                        | <i>AMT</i>      | (Abrahams et al., 2013)                            |
|               |                  |                           |      | X                        | <i>ANK2</i>     | (Abrahams et al., 2013)                            |
|               |                  |                           |      | X                        | <i>ANK3</i>     | (Abrahams et al., 2013)                            |
|               |                  |                           | X    | X                        | <i>ANKRD11</i>  | (Abrahams et al., 2013)                            |

|   |   |   |   |   |                |                                |
|---|---|---|---|---|----------------|--------------------------------|
|   |   |   |   | X | <i>ANXA1</i>   | (Abrahams et al., 2013)        |
|   |   |   |   | X | <i>AP1S2</i>   | (Abrahams et al., 2013)        |
|   |   |   |   | X | <i>AP2S1</i>   | (Abrahams et al., 2013)        |
|   |   |   |   | X | <i>APBB1</i>   | (Abrahams et al., 2013)        |
|   |   |   |   | X | <i>APH1A</i>   | (Abrahams et al., 2013)        |
|   |   | X |   |   | <i>APOE</i>    | (Lohoff, 2010)                 |
|   |   |   |   | X | <i>ARHGEF9</i> | (Abrahams et al., 2013)        |
|   |   |   |   | X | <i>ARID1B</i>  | (Abrahams et al., 2013)        |
|   |   |   | X |   | <i>ARTN</i>    | (Demontis et al., 2019)        |
| X |   |   |   |   | <i>ARVCF</i>   | (Liu et al., 2019)             |
|   |   |   |   | X | <i>ARX</i>     | (Abrahams et al., 2013)        |
|   |   |   |   | X | <i>ASAP2</i>   | (Abrahams et al., 2013)        |
|   |   |   |   | X | <i>ASH1L</i>   | (Abrahams et al., 2013)        |
|   |   |   |   | X | <i>ASPM</i>    | (Abrahams et al., 2013)        |
|   |   |   |   | X | <i>ASTN2</i>   | (Abrahams et al., 2013)        |
|   |   |   |   | X | <i>ASXL3</i>   | (Abrahams et al., 2013)        |
| X |   |   |   |   | <i>ATK3</i>    | (Schmidt-Kastner et al., 2020) |
|   |   |   | X |   | <i>ATM</i>     | (Hayman and Fernandez, 2018)   |
|   |   |   |   | X | <i>ATP10A</i>  | (Abrahams et al., 2013)        |
| X |   |   |   |   | <i>ATP2A2</i>  | (Schmidt-Kastner et al., 2020) |
|   |   |   |   | X | <i>ATP2B2</i>  | (Abrahams et al., 2013)        |
|   |   |   | X |   | <i>ATP6V0B</i> | (Demontis et al., 2019)        |
|   |   |   |   | X | <i>ATRX</i>    | (Abrahams et al., 2013)        |
|   | X |   |   |   | <i>ATXN7L3</i> | (Stahl et al., 2019)           |
|   |   |   |   | X | <i>AUTS2</i>   | (Abrahams et al., 2013)        |
|   |   |   |   | X | <i>AVPR1A</i>  | (Abrahams et al., 2013)        |
|   |   |   |   | X | <i>B4GALT2</i> | (Demontis et al., 2019)        |
|   |   |   |   | X | <i>BAZ2B</i>   | (Abrahams et al., 2013)        |
|   |   |   |   | X | <i>BCKDK</i>   | (Abrahams et al., 2013)        |
|   |   |   |   | X | <i>BCL11A</i>  | (Abrahams et al., 2013)        |
|   |   |   |   | X | <i>BCORL1</i>  | (Abrahams et al., 2013)        |
|   | X | X |   |   | <i>BDNF</i>    | (Lohoff, 2010)                 |
|   |   |   |   | X | <i>BICRA</i>   | (Abrahams et al., 2013)        |
| X |   |   |   |   | <i>BNIP3L</i>  | (Schmidt-Kastner et al., 2020) |
|   |   |   |   | X | <i>BRAF</i>    | (Abrahams et al., 2013)        |
|   |   |   |   | X | <i>BRSK2</i>   | (Abrahams et al., 2013)        |
|   |   |   |   | X | <i>BRWD3</i>   | (Abrahams et al., 2013)        |

|   |   |   |   |   |                 |                                                                                                |
|---|---|---|---|---|-----------------|------------------------------------------------------------------------------------------------|
|   |   |   |   | X | <i>BTAF1</i>    | (Abrahams et al., 2013)                                                                        |
| X |   |   |   |   | <i>BTG1</i>     | (Schmidt-Kastner et al., 2020)                                                                 |
|   |   |   |   | X | <i>C12orf57</i> | (Abrahams et al., 2013)                                                                        |
|   |   |   |   | X | <i>CACNA1A</i>  | (Abrahams et al., 2013)                                                                        |
| X | X |   |   | X | <i>CACNA1C</i>  | (Abrahams et al., 2013), (Bhat et al., 2012), (Charney et al., 2017), (Yoshikawa et al., 2021) |
|   |   |   |   | X | <i>CACNA1D</i>  | (Abrahams et al., 2013)                                                                        |
|   |   |   |   | X | <i>CACNA1E</i>  | (Abrahams et al., 2013)                                                                        |
|   |   |   |   | X | <i>CACNA1H</i>  | (Abrahams et al., 2013)                                                                        |
|   |   |   |   | X | <i>CACNA2D3</i> | (Abrahams et al., 2013)                                                                        |
|   | X |   |   | X | <i>Cacna2d4</i> | (Schmidt-Kastner et al., 2020)                                                                 |
| X |   |   |   | X | <i>CACNB2</i>   | (Abrahams et al., 2013)                                                                        |
|   |   |   |   | X | <i>CAMK2B</i>   | (Abrahams et al., 2013)                                                                        |
|   |   |   | X |   | <i>CAMK2D</i>   | (Hayman and Fernandez, 2018)                                                                   |
|   |   |   | X |   | <i>CAMK2G</i>   | (Hayman and Fernandez, 2018)                                                                   |
|   |   |   |   | X | <i>CAPRIN1</i>  | (Abrahams et al., 2013)                                                                        |
|   |   |   |   | X | <i>CASK</i>     | (Abrahams et al., 2013)                                                                        |
|   |   |   |   | X | <i>CASZ1</i>    | (Abrahams et al., 2013)                                                                        |
|   |   | X |   |   | <i>CATSPER1</i> | (Stahl et al., 2019)                                                                           |
|   |   |   |   | X | <i>CC2D1A</i>   | (Abrahams et al., 2013)                                                                        |
|   |   |   | X |   | <i>CCDC24</i>   | (Demontis et al., 2019)                                                                        |
|   |   |   |   | X | <i>CCNG1</i>    | (Abrahams et al., 2013)                                                                        |
|   |   |   |   | X | <i>CCNK</i>     | (Abrahams et al., 2013)                                                                        |
|   |   |   |   | X | <i>CCT4</i>     | (Abrahams et al., 2013)                                                                        |
|   |   |   |   | X | <i>CDC42BPB</i> | (Abrahams et al., 2013)                                                                        |
|   |   |   |   | X | <i>CDH13</i>    | (Abrahams et al., 2013)                                                                        |
|   |   |   |   | X | <i>Cdh8</i>     | (Pagnamenta et al., 2011)                                                                      |
|   |   |   |   | X | <i>CDK13</i>    | (Abrahams et al., 2013)                                                                        |
| X |   |   |   |   | <i>CDK2AP1</i>  | (Schmidt-Kastner et al., 2020)                                                                 |
|   |   |   |   | X | <i>CDK8</i>     | (Abrahams et al., 2013)                                                                        |
|   |   |   |   | X | <i>CDKL5</i>    | (Abrahams et al., 2013)                                                                        |
|   |   |   |   | X | <i>CELF4</i>    | (Abrahams et al., 2013)                                                                        |
|   |   |   |   | X | <i>CEP135</i>   | (Abrahams et al., 2013)                                                                        |
|   |   |   |   | X | <i>CEP41</i>    | (Abrahams et al., 2013)                                                                        |
|   |   |   |   | X | <i>CGNL1</i>    | (Abrahams et al., 2013)                                                                        |
|   |   |   |   | X | <i>CHAMP1</i>   | (Abrahams et al., 2013)                                                                        |
|   |   |   |   | X | <i>CHD2</i>     | (Abrahams et al., 2013)                                                                        |

|   |   |   |   |   |                |                                                          |
|---|---|---|---|---|----------------|----------------------------------------------------------|
|   |   |   |   | X | <i>CHD3</i>    | (Abrahams et al., 2013)                                  |
|   |   |   |   | X | <i>CHD7</i>    | (Abrahams et al., 2013)                                  |
|   |   |   |   | X | <i>CHD8</i>    | (Abrahams et al., 2013)                                  |
|   |   |   |   | X | <i>CHKB</i>    | (Abrahams et al., 2013)                                  |
|   |   |   |   | X | <i>CHMP1A</i>  | (Abrahams et al., 2013)                                  |
|   |   |   |   | X | <i>CHRNA7</i>  | (Abrahams et al., 2013)                                  |
|   |   |   |   | X | <i>CIB2</i>    | (Abrahams et al., 2013)                                  |
|   |   |   |   | X | <i>CIC</i>     | (Abrahams et al., 2013)                                  |
|   |   |   |   | X | <i>CLASP1</i>  | (Abrahams et al., 2013)                                  |
| X |   |   |   |   | <i>CLCN3</i>   | (Christensen and Børglum, 2019)                          |
| X |   |   |   |   | <i>CLU</i>     | (Schmidt-Kastner et al., 2020)                           |
|   |   |   |   | X | <i>CNKSR2</i>  | (Abrahams et al., 2013)                                  |
|   |   |   |   | X | <i>CNOT1</i>   | (Abrahams et al., 2013), (Arcos-Burgos et al., 2012)     |
|   |   |   |   | X | <i>CNOT3</i>   | (Abrahams et al., 2013), (Christensen and Børglum, 2019) |
|   |   |   | X | X | <i>CNR1</i>    | (Abrahams et al., 2013)                                  |
|   |   |   |   | X | <i>CNTN3</i>   | (Chaste and Leboyer, 2012)                               |
| X |   |   |   | X | <i>CNTN4</i>   | (Abrahams et al., 2013)                                  |
|   |   |   |   | X | <i>CNTN5</i>   | (Abrahams et al., 2013)                                  |
|   |   |   |   | X | <i>CNTN6</i>   | (Abrahams et al., 2013)                                  |
|   |   |   |   | X | <i>CNTNAP2</i> | (Abrahams et al., 2013)                                  |
|   |   |   |   | X | <i>CNTNAP3</i> | (Abrahams et al., 2013)                                  |
|   |   |   |   | X | <i>CNTNAP4</i> | (Abrahams et al., 2013)                                  |
|   |   | X | X |   | <i>COMT</i>    | (Shadrina et al., 2018)                                  |
|   |   |   |   | X | <i>CORO1A</i>  | (Abrahams et al., 2013)                                  |
| X |   |   |   |   | <i>CPEB1</i>   | (Schmidt-Kastner et al., 2020)                           |
|   |   |   |   | X | <i>CPEB4</i>   | (Abrahams et al., 2013)                                  |
| X |   |   |   |   | <i>CPT1C</i>   | (Schmidt-Kastner et al., 2020)                           |
| X |   |   |   |   | <i>CREB3L1</i> | (Schmidt-Kastner et al., 2020)                           |
|   |   |   |   | X | <i>CREBBP</i>  | (Abrahams et al., 2013)                                  |
|   |   |   |   | X | <i>CSDE1</i>   | (Abrahams et al., 2013)                                  |
|   |   |   |   | X | <i>CSNK2A1</i> | (Abrahams et al., 2013)                                  |
|   | X |   |   |   | <i>CSRNP3</i>  | (Stahl et al., 2019)                                     |
|   |   |   |   | X | <i>CTCF</i>    | (Abrahams et al., 2013)                                  |
|   |   |   |   | X | <i>CTNNA2</i>  | (Abrahams et al., 2013)                                  |
|   |   |   |   | X | <i>CTNNB1</i>  | (Abrahams et al., 2013)                                  |

|   |   |   |   |   |                  |                                                                                 |
|---|---|---|---|---|------------------|---------------------------------------------------------------------------------|
|   |   |   |   | X | <i>CTNND2</i>    | (Abrahams et al., 2013)                                                         |
|   |   |   |   | X | <i>CTTNBP2</i>   | (Abrahams et al., 2013)                                                         |
|   |   |   |   | X | <i>CUL3</i>      | (Abrahams et al., 2013)                                                         |
| X |   |   |   |   | <i>CUL3EP300</i> | (Schmidt-Kastner et al., 2020)                                                  |
|   |   |   |   | X | <i>CUL7</i>      | (Abrahams et al., 2013)                                                         |
|   |   |   |   | X | <i>CUX1</i>      | (Abrahams et al., 2013)                                                         |
|   |   |   |   | X | <i>CYFIP1</i>    | (Abrahams et al., 2013)                                                         |
|   |   |   |   | X | <i>CYP27A1</i>   | (Abrahams et al., 2013), (Liu et al., 2019)                                     |
| X |   |   |   |   | <i>DAO</i>       | (Verrall et al., 2010)                                                          |
| X |   | X |   |   | <i>DAOA</i>      | (Arias et al., 2014)                                                            |
|   |   |   |   | X | <i>DAPP1</i>     | (Abrahams et al., 2013)                                                         |
|   | X | X | X |   | <i>DAT1</i>      | (Hawi et al., 2005)                                                             |
|   |   |   | X |   | <i>DBH</i>       | (Hawi et al., 2005)                                                             |
|   |   |   |   | X | <i>DCC</i>       | (Abrahams et al., 2013)                                                         |
|   | X |   |   |   | <i>DCLK3</i>     | (Chen et al., 2013), (McMahon and Detera-Wadleigh, 2020)                        |
|   |   |   |   | X | <i>DDHD2</i>     | (Abrahams et al., 2013)                                                         |
|   |   |   |   | X | <i>DDX3X</i>     | (Abrahams et al., 2013)                                                         |
|   |   |   |   | X | <i>DEAF1</i>     | (Abrahams et al., 2013)                                                         |
|   |   |   |   | X | <i>DENR</i>      | (Abrahams et al., 2013)                                                         |
|   |   |   |   | X | <i>DEPDC5</i>    | (Abrahams et al., 2013)                                                         |
|   | X |   |   |   | <i>DGKH</i>      | (Baum et al., 2008)                                                             |
|   |   |   |   | X | <i>DHCR7</i>     | (Abrahams et al., 2013)                                                         |
|   | X |   |   |   | <i>DHH</i>       | (Charney et al., 2017), (McMahon and Detera-Wadleigh, 2020), (Hou et al., 2016) |
|   |   |   |   | X | <i>DHX30</i>     | (Abrahams et al., 2013)                                                         |
|   |   |   |   | X | <i>DIP2A</i>     | (Abrahams et al., 2013)                                                         |
|   |   |   |   | X | <i>DIP2C</i>     | (Abrahams et al., 2013)                                                         |
|   |   |   | X |   | <i>DIRAS2</i>    | (Hayman and Fernandez, 2018)                                                    |
| X |   | X |   | X | <i>DISC1</i>     | (Abrahams et al., 2013), (Thomson et al., 2013)                                 |
|   |   |   |   | X | <i>DLG2</i>      | (Abrahams et al., 2013)                                                         |
|   |   |   |   | X | <i>DLG4</i>      | (Abrahams et al., 2013)                                                         |
|   |   |   |   | X | <i>DLGAP1</i>    | (Abrahams et al., 2013)                                                         |
|   |   |   |   | X | <i>Dlgap2</i>    | (Poquet et al., 2016)                                                           |
|   |   |   |   | X | <i>DLX3</i>      | (Abrahams et al., 2013)                                                         |
|   |   |   |   | X | <i>DMD</i>       | (Abrahams et al., 2013)                                                         |
|   |   |   |   | X | <i>DMPK</i>      | (Abrahams et al., 2013)                                                         |

|   |   |   |   |   |                |                                                          |
|---|---|---|---|---|----------------|----------------------------------------------------------|
|   | X |   |   |   | <i>DNAH1</i>   | (McMahon and Detera-Wadleigh, 2020), (Chen et al., 2013) |
|   |   |   |   | X | <i>DNMT3A</i>  | (Abrahams et al., 2013)                                  |
|   |   |   |   | X | <i>DOCK8</i>   | (Abrahams et al., 2013)                                  |
|   |   |   |   | X | <i>DOLK</i>    | (Abrahams et al., 2013)                                  |
|   |   |   | X |   | <i>DPH2</i>    | (Demontis et al., 2019)                                  |
|   |   |   |   | X | <i>DPP10</i>   | (Abrahams et al., 2013)                                  |
|   |   |   |   | X | <i>Dpp6</i>    | (Marshall et al., 2008)                                  |
|   |   |   |   | X | <i>DPYSL2</i>  | (Abrahams et al., 2013)                                  |
|   | X |   |   |   | <i>DRD1</i>    | (Ni et al., 2002)                                        |
| X |   |   |   |   | <i>DRD2</i>    | (Beaulieu and Gainetdinov, 2011)                         |
|   |   |   |   | X | <i>DRD3</i>    | (Shadrina et al., 2018)                                  |
|   | X | X | X |   | <i>DRD4</i>    | (Shadrina et al., 2018)                                  |
|   |   |   | X |   | <i>DRD5</i>    | (Mill et al., 2005)                                      |
|   |   |   |   | X | <i>DSCAM</i>   | (Abrahams et al., 2013)                                  |
|   |   |   | X |   | <i>DUSP6</i>   | (Demontis et al., 2019)                                  |
|   |   |   |   | X | <i>DYNC1H1</i> | (Abrahams et al., 2013)                                  |
|   |   |   |   | X | <i>DYRK1A</i>  | (Abrahams et al., 2013)                                  |
|   |   |   |   | X | <i>EBF3</i>    | (Abrahams et al., 2013)                                  |
|   |   |   |   | X | <i>EEF1A2</i>  | (Abrahams et al., 2013)                                  |
|   |   |   |   | X | <i>EFR3A</i>   | (Abrahams et al., 2013)                                  |
|   |   |   |   | X | <i>EHMT1</i>   | (Abrahams et al., 2013)                                  |
|   |   |   |   | X | <i>EIF3G</i>   | (Abrahams et al., 2013)                                  |
|   |   |   |   | X | <i>ELAVL3</i>  | (Abrahams et al., 2013)                                  |
|   |   |   |   | X | <i>ELP4</i>    | (Abrahams et al., 2013)                                  |
|   |   |   |   | X | <i>EMSY</i>    | (Abrahams et al., 2013)                                  |
|   |   |   |   | X | <i>EP300</i>   | (Abrahams et al., 2013)                                  |
|   |   |   |   | X | <i>EP400</i>   | (Abrahams et al., 2013)                                  |
| X |   |   |   |   | <i>ERBB4</i>   | (Mei and Xiong, 2008)                                    |
|   |   |   |   | X | <i>ERBIN</i>   | (Abrahams et al., 2013)                                  |
| X |   |   |   |   | <i>ESRP2</i>   | (Schmidt-Kastner et al., 2020)                           |
|   |   |   |   | X | <i>ETFB</i>    | (Abrahams et al., 2013), (Schmidt-Kastner et al., 2020)  |
|   |   |   |   | X | <i>FAM92B</i>  | (Abrahams et al., 2013)                                  |
|   |   |   |   | X | <i>FBN1</i>    | (Abrahams et al., 2013)                                  |
|   |   |   |   | X | <i>FBRSL1</i>  | (Abrahams et al., 2013)                                  |
| X |   |   |   | X | <i>FGFR1</i>   | (Abrahams et al., 2013), (Demontis et al., 2019)         |



|   |   |  |   |   |                |                                                         |
|---|---|--|---|---|----------------|---------------------------------------------------------|
|   |   |  |   | X | <i>FMR1</i>    | (Abrahams et al., 2013)                                 |
|   |   |  |   | X | <i>FOXG1</i>   | (Abrahams et al., 2013)                                 |
|   |   |  |   | X | <i>FOXP1</i>   | (Abrahams et al., 2013)                                 |
|   |   |  | X | X | <i>FOXP2</i>   | (Abrahams et al., 2013)                                 |
|   |   |  |   | X | <i>FRMPD4</i>  | (Abrahams et al., 2013)                                 |
|   | X |  |   |   | <i>FSTL5</i>   | (Stahl et al., 2019)                                    |
| X |   |  |   |   | <i>FURIN</i>   | (Schmidt-Kastner et al., 2020)                          |
|   |   |  |   | X | <i>GABRA3</i>  | (Abrahams et al., 2013)                                 |
|   |   |  |   | X | <i>GABRB2</i>  | (Abrahams et al., 2013)                                 |
|   |   |  |   | X | <i>GABRB3</i>  | (Abrahams et al., 2013)                                 |
|   |   |  |   | X | <i>GABRG3</i>  | (Abrahams et al., 2013)                                 |
|   | X |  |   |   | <i>GAL3ST3</i> | (Stahl et al., 2019)                                    |
|   |   |  |   | X | <i>GALNT10</i> | (Abrahams et al., 2013)                                 |
|   |   |  |   | X | <i>GALNT2</i>  | (Abrahams et al., 2013)                                 |
|   | X |  |   |   | <i>GALNT3</i>  | (Stahl et al., 2019)                                    |
|   |   |  |   | X | <i>GALNT8</i>  | (Abrahams et al., 2013)                                 |
|   |   |  |   | X | <i>GATM</i>    | (Abrahams et al., 2013)                                 |
|   |   |  |   | X | <i>GFAP</i>    | (Abrahams et al., 2013)                                 |
|   |   |  |   | X | <i>GGNBP2</i>  | (Abrahams et al., 2013)                                 |
|   |   |  |   | X | <i>GIGYF1</i>  | (Abrahams et al., 2013)                                 |
|   |   |  |   | X | <i>GIGYF2</i>  | (Abrahams et al., 2013)                                 |
|   |   |  | X |   | <i>GIT1</i>    | (Palladino et al., 2019)                                |
|   |   |  |   | X | <i>GNAI1</i>   | (Abrahams et al., 2013)                                 |
| X |   |  |   |   | <i>GNB3</i>    | (Lohoff, 2010),                                         |
|   |   |  |   | X | <i>GPC4</i>    | (Abrahams et al., 2013)                                 |
|   |   |  |   | X | <i>GPHN</i>    | (Abrahams et al., 2013)                                 |
|   | X |  |   |   | <i>GRB7</i>    | (McMahon and Detera-Wadleigh, 2020), (Hou et al., 2016) |
| X |   |  |   | X | <i>GRIA1</i>   | (Abrahams et al., 2013), (Barkus et al., 2014)          |
|   |   |  |   | X | <i>Gria3</i>   | (Chaste and Leboyer, 2012)                              |
|   |   |  |   | X | <i>GRID1</i>   | (Abrahams et al., 2013)                                 |
|   |   |  |   | X | <i>GRIK2</i>   | (Abrahams et al., 2013)                                 |
|   |   |  |   | X | <i>GRIK5</i>   | (Abrahams et al., 2013)                                 |
|   |   |  |   | X | <i>GRIN1</i>   | (Abrahams et al., 2013)                                 |
| X | X |  |   | X | <i>GRIN2A</i>  | (Abrahams et al., 2013)                                 |
| X |   |  | X | X | <i>GRIN2B</i>  | (Abrahams et al., 2013), (Yoshikawa et al., 2021)       |

|   |   |   |   |   |                |                                |
|---|---|---|---|---|----------------|--------------------------------|
|   |   |   |   | X | <i>GRIP1</i>   | (Abrahams et al., 2013)        |
|   |   |   | X |   | <i>GRM1</i>    | (Hayman and Fernandez, 2018)   |
| X | X |   |   |   | <i>GRM3</i>    | (Kandaswamy et al., 2013)      |
|   |   |   |   | X | <i>HCFC1</i>   | (Abrahams et al., 2013)        |
|   |   |   |   | X | <i>HCN1</i>    | (Abrahams et al., 2013)        |
|   |   |   |   | X | <i>HDAC8</i>   | (Abrahams et al., 2013)        |
|   |   |   |   | X | <i>HDLBP</i>   | (Abrahams et al., 2013)        |
|   |   |   |   | X | <i>HECTD4</i>  | (Abrahams et al., 2013)        |
|   |   |   |   | X | <i>HECW2</i>   | (Abrahams et al., 2013)        |
|   |   |   |   | X | <i>HEPACAM</i> | (Abrahams et al., 2013)        |
|   |   |   |   | X | <i>HERC2</i>   | (Abrahams et al., 2013)        |
|   |   |   |   | X | <i>HIVEP2</i>  | (Abrahams et al., 2013)        |
|   |   |   |   | X | <i>HIVEP3</i>  | (Abrahams et al., 2013)        |
|   |   |   |   | X | <i>HMGN1</i>   | (Abrahams et al., 2013)        |
|   |   |   |   | X | <i>HNRNPH2</i> | (Abrahams et al., 2013)        |
|   |   |   |   | X | <i>HNRNPU</i>  | (Abrahams et al., 2013)        |
|   |   |   |   | X | <i>HOXA1</i>   | (Abrahams et al., 2013)        |
|   |   |   |   | X | <i>HRAS</i>    | (Abrahams et al., 2013)        |
| X |   |   |   |   | <i>HSPA9</i>   | (Schmidt-Kastner et al., 2020) |
| X |   |   |   |   | <i>HSPD1</i>   | (Schmidt-Kastner et al., 2020) |
| X |   |   |   |   | <i>HSPE1</i>   | (Schmidt-Kastner et al., 2020) |
|   |   | X |   |   | <i>HTR12A</i>  | (Shadrina et al., 2018)        |
|   |   | X |   |   | <i>HTR1A</i>   | (Shadrina et al., 2018)        |
|   |   | X |   |   | <i>HTR1B</i>   | (Shadrina et al., 2018)        |
|   | X | X |   |   | <i>HTR2A</i>   | (Lohoff, 2010)                 |
|   |   | X |   |   | <i>HTR2C</i>   | (Shadrina et al., 2018)        |
|   | X |   |   |   | <i>HTTLPR</i>  | (Neves et al., 2008)           |
|   |   |   |   | X | <i>HUWE1</i>   | (Abrahams et al., 2013)        |
|   |   |   |   | X | <i>ICA1</i>    | (Abrahams et al., 2013)        |
|   |   |   |   | X | <i>ILF2</i>    | (Abrahams et al., 2013)        |
| X |   |   |   |   | <i>INA</i>     | (Schmidt-Kastner et al., 2020) |
|   |   |   |   | X | <i>INTS1</i>   | (Abrahams et al., 2013)        |
|   |   |   |   | X | <i>INTS6</i>   | (Abrahams et al., 2013)        |
|   |   |   | X |   | <i>IPO13</i>   | (Demontis et al., 2019)        |
|   |   |   |   | X | <i>IQSEC2</i>  | (Abrahams et al., 2013)        |
|   |   |   |   | X | <i>IRF2BPL</i> | (Abrahams et al., 2013)        |
|   |   |   |   | X | <i>ITGB3</i>   | (Abrahams et al., 2013)        |

|   |   |  |   |   |                  |                                                                                 |
|---|---|--|---|---|------------------|---------------------------------------------------------------------------------|
|   |   |  |   | X | <i>JARID2</i>    | (Abrahams et al., 2013)                                                         |
|   |   |  |   | X | <i>KANSL1</i>    | (Abrahams et al., 2013)                                                         |
|   |   |  |   | X | <i>KAT2B</i>     | (Abrahams et al., 2013)                                                         |
| X |   |  |   |   | <i>KAT5</i>      | (Schmidt-Kastner et al., 2020)                                                  |
|   |   |  |   | X | <i>KAT6A</i>     | (Abrahams et al., 2013)                                                         |
|   |   |  |   | X | <i>KATNAL2</i>   | (Abrahams et al., 2013)                                                         |
|   |   |  |   | X | <i>KCNB1</i>     | (Abrahams et al., 2013)                                                         |
|   |   |  |   | X | <i>KCNJ10</i>    | (Abrahams et al., 2013)                                                         |
|   |   |  |   | X | <i>KCNQ2</i>     | (Abrahams et al., 2013)                                                         |
|   |   |  |   | X | <i>KCNQ3</i>     | (Abrahams et al., 2013)                                                         |
|   |   |  |   | X | <i>KCNS3</i>     | (Abrahams et al., 2013)                                                         |
|   |   |  |   | X | <i>KDM3B</i>     | (Abrahams et al., 2013)                                                         |
| X |   |  | X |   | <i>KDM4A</i>     | (Demontis et al., 2019)                                                         |
|   |   |  |   | X | <i>KDM4C</i>     | (Abrahams et al., 2013)                                                         |
|   |   |  |   | X | <i>KDM5B</i>     | (Abrahams et al., 2013)                                                         |
|   |   |  |   | X | <i>KDM5C</i>     | (Abrahams et al., 2013)                                                         |
|   |   |  |   | X | <i>KDM6A</i>     | (Abrahams et al., 2013)                                                         |
|   |   |  |   | X | <i>KDM6B</i>     | (Abrahams et al., 2013)                                                         |
|   |   |  | X |   | <i>KDMA-AS1</i>  | (Demontis et al., 2019)                                                         |
|   |   |  |   | X | <i>KIAA0232</i>  | (Abrahams et al., 2013)                                                         |
|   |   |  |   | X | <i>KIAA1586</i>  | (Abrahams et al., 2013)                                                         |
|   |   |  |   | X | <i>KIF14</i>     | (Abrahams et al., 2013)                                                         |
|   |   |  |   | X | <i>KIRREL3</i>   | (Abrahams et al., 2013)                                                         |
|   |   |  |   | X | <i>KMT2A</i>     | (Abrahams et al., 2013)                                                         |
|   |   |  |   | X | <i>KMT2C</i>     | (Abrahams et al., 2013)                                                         |
|   | X |  |   |   | <i>KMT2D</i>     | (Charney et al., 2017), (McMahon and Detera-Wadleigh, 2020), (Hou et al., 2016) |
|   |   |  |   | X | <i>KMT2E</i>     | (Abrahams et al., 2013)                                                         |
|   |   |  |   | X | <i>KMT5B</i>     | (Abrahams et al., 2013)                                                         |
|   |   |  |   | X | <i>KPTN</i>      | (Abrahams et al., 2013)                                                         |
|   |   |  |   | X | <i>LAMB1</i>     | (Abrahams et al., 2013)                                                         |
|   |   |  |   | X | <i>LDB1</i>      | (Abrahams et al., 2013)                                                         |
|   |   |  |   | X | <i>LEO1</i>      | (Abrahams et al., 2013)                                                         |
|   |   |  | X |   | <i>LINC00461</i> | (Demontis et al., 2019)                                                         |
|   | X |  |   |   | <i>LINC01215</i> | (Stahl et al., 2019)                                                            |
|   |   |  | X |   | <i>LINC01288</i> | (Demontis et al., 2019)                                                         |

|   |   |   |   |   |                     |                                                          |
|---|---|---|---|---|---------------------|----------------------------------------------------------|
|   |   |   | X |   | <i>LINC01572</i>    | (Demontis et al., 2019)                                  |
|   |   |   | X |   | <i>LINC02060</i>    | (Demontis et al., 2019)                                  |
|   |   |   | X |   | <i>LINC02497</i>    | (Demontis et al., 2019)                                  |
|   |   |   |   | X | <i>LMX1B</i>        | (Abrahams et al., 2013)                                  |
|   |   |   |   | X | <i>LNPk</i>         | (Abrahams et al., 2013)                                  |
|   | X |   |   |   | <i>LOC101927314</i> | (Mühleisen et al., 2014)                                 |
|   | X |   |   |   | <i>LOC102725191</i> | (Stahl et al., 2019)                                     |
|   | X |   |   |   | <i>LOC105371789</i> | (Stahl et al., 2019)                                     |
|   |   |   | X |   | <i>LPHN3</i>        | (Schmidt-Kastner et al., 2020)                           |
| X |   |   |   | X | <i>LRP1</i>         | (Abrahams et al., 2013)                                  |
|   |   |   |   | X | <i>LRRC4C</i>       | (Abrahams et al., 2013)                                  |
| X |   |   |   |   | <i>LSM1</i>         | (Schmidt-Kastner et al., 2020)                           |
|   |   |   |   | X | <i>LZTR1</i>        | (Abrahams et al., 2013)                                  |
|   |   |   |   | X | <i>MACROD2</i>      | (Abrahams et al., 2013)                                  |
| X |   |   |   |   | <i>MAD1L1</i>       | (Schmidt-Kastner et al., 2020)                           |
|   |   |   |   | X | <i>MAGEL2</i>       | (Abrahams et al., 2013)                                  |
|   |   | X |   |   | <i>MAOA</i>         | (Shadrina et al., 2018)                                  |
|   |   |   |   | X | <i>MAP1A</i>        | (Abrahams et al., 2013)                                  |
|   |   |   |   | X | <i>MAPT-AS1</i>     | (Abrahams et al., 2013)                                  |
|   |   |   |   | X | <i>MBD5</i>         | (Abrahams et al., 2013)                                  |
|   |   |   |   | X | <i>MBOAT7</i>       | (Abrahams et al., 2013)                                  |
| X |   |   |   |   | <i>MDK</i>          | (Schmidt-Kastner et al., 2020)                           |
|   |   |   |   | X | <i>MECP2</i>        | (Abrahams et al., 2013)                                  |
|   |   |   |   | X | <i>MED13</i>        | (Abrahams et al., 2013)                                  |
|   |   |   |   | X | <i>MED13L</i>       | (Abrahams et al., 2013)                                  |
| X |   |   |   | X | <i>MEF2C</i>        | (Abrahams et al., 2013)                                  |
|   |   |   |   | X | <i>MEIS2</i>        | (Abrahams et al., 2013)                                  |
|   |   |   |   | X | <i>MET</i>          | (Abrahams et al., 2013)                                  |
|   |   |   |   | X | <i>MFRP</i>         | (Abrahams et al., 2013)                                  |
|   |   |   |   | X | <i>MIEN1</i>        | (McMahon and Detera-Wadleigh, 2020), (Hou et al., 2016)  |
| X |   |   |   | X | <i>MIR137</i>       | (Pasquinelli, 2012)                                      |
|   | X |   |   |   | <i>MIR3127</i>      | (McMahon and Detera-Wadleigh, 2020), (Chen et al., 2013) |
|   |   |   | X |   | <i>MIR3666</i>      | (Demontis et al., 2019)                                  |
|   | X |   |   |   | <i>MIR4655</i>      | (McMahon and Detera-Wadleigh, 2020), (Hou et al., 2016)  |

|   |   |   |   |   |                     |                                                             |
|---|---|---|---|---|---------------------|-------------------------------------------------------------|
|   | X |   |   |   | <i>MIR4728</i>      | (McMahon and Detera-Wadleigh, 2020), (Hou et al., 2016)     |
|   | X |   |   |   | <i>MIR640</i>       | (Cichon et al., 2011), (McMahon and Detera-Wadleigh, 2020)  |
|   |   |   | X |   | <i>MIR9-2</i>       | (Demontis et al., 2019)                                     |
|   | X |   |   |   | <i>MIRLET7G</i>     | (McMahon and Detera-Wadleigh, 2020), (Chen et al., 2013)    |
|   |   |   |   | X | <i>MKX</i>          | (Abrahams et al., 2013)                                     |
|   |   |   |   | X | <i>MSL3</i>         | (Abrahams et al., 2013)                                     |
|   |   |   |   | X | <i>MSNP1AS</i>      | (Abrahams et al., 2013)                                     |
| X |   | X |   |   | <i>MTHFR</i>        | (Lohoff, 2010)                                              |
|   |   |   |   | X | <i>MTOR</i>         | (Abrahams et al., 2013)                                     |
|   | X |   |   |   | <i>MXI1</i>         | (Charney et al., 2017), (McMahon and Detera-Wadleigh, 2020) |
|   |   |   |   | X | <i>MYH10</i>        | (Abrahams et al., 2013)                                     |
|   |   |   |   | X | <i>MYH9</i>         | (Abrahams et al., 2013)                                     |
|   |   |   |   | X | <i>MYO5A</i>        | (Abrahams et al., 2013)                                     |
|   |   |   |   | X | <i>MYO9B</i>        | (Abrahams et al., 2013)                                     |
|   |   |   |   | X | <i>MYT1L</i>        | (Abrahams et al., 2013)                                     |
|   |   |   |   | X | <i>NAA15</i>        | (Abrahams et al., 2013)                                     |
|   |   |   |   | X | <i>NACC1</i>        | (Abrahams et al., 2013)                                     |
|   |   |   |   | X | <i>NAV2</i>         | (Abrahams et al., 2013)                                     |
|   |   |   |   | X | <i>NBEA</i>         | (Abrahams et al., 2013)                                     |
|   | X |   |   |   | <i>NCAM1</i>        | (Escamilla and Zavala, 2008)                                |
| X | X |   |   |   | <i>NCAN</i>         | (Cichon et al., 2011), (McMahon and Detera-Wadleigh, 2020)  |
|   |   |   |   | X | <i>NCKAP1</i>       | (Abrahams et al., 2013)                                     |
|   |   |   |   | X | <i>NCOA1</i>        | (Abrahams et al., 2013)                                     |
|   |   |   |   | X | <i>NCOR1</i>        | (Abrahams et al., 2013)                                     |
| X |   |   |   |   | <i>NDST3</i>        | (Liu et al., 2019)                                          |
| X |   |   |   |   | <i>NEK1</i>         | (Schmidt-Kastner et al., 2020)                              |
|   |   |   |   | X | <i>NEXMIF</i>       | (Abrahams et al., 2013)                                     |
|   |   |   |   | X | <i>NF1</i>          | (Abrahams et al., 2013)                                     |
|   |   |   |   | X | <i>NFE2L3</i>       | (Abrahams et al., 2013)                                     |
|   | X |   |   | X | <i>NFIX</i>         | (Abrahams et al., 2013)                                     |
| X |   |   |   |   | <i>NGEF</i>         | (Schmidt-Kastner et al., 2020)                              |
| X |   |   |   |   | <i>NGN2/NEUROG2</i> | (Christensen and Børglum, 2019)                             |
|   |   |   |   | X | <i>NINL</i>         | (Abrahams et al., 2013)                                     |

|   |   |   |   |   |               |                                                       |
|---|---|---|---|---|---------------|-------------------------------------------------------|
|   |   |   |   | X | <i>NIPBL</i>  | (Abrahams et al., 2013)                               |
|   |   |   |   | X | <i>NLGN1</i>  | (Abrahams et al., 2013)                               |
|   |   |   |   | X | <i>NLGN2</i>  | (Abrahams et al., 2013)                               |
|   |   |   |   | X | <i>NLGN3</i>  | (Abrahams et al., 2013)                               |
|   |   |   |   | X | <i>NLGN4X</i> | (Abrahams et al., 2013)                               |
| X |   |   |   |   | <i>NMB</i>    | (Schmidt-Kastner et al., 2020)                        |
|   |   |   | X |   | <i>NOS1</i>   | (Weber et al., 2015)                                  |
| X |   |   |   |   | <i>NOTCH4</i> | (Liu et al., 2019)                                    |
|   |   |   |   | X | <i>NOVA2</i>  | (Abrahams et al., 2013)                               |
|   |   | X |   |   | <i>NR3C1</i>  | (Lohoff, 2010)                                        |
|   |   |   |   | X | <i>NR3C2</i>  | (Abrahams et al., 2013)                               |
| X |   | X |   | X | <i>NR4A2</i>  | (Abrahams et al., 2013)                               |
| X | X |   |   |   | <i>NRG1</i>   | (Mei and Nave, 2014),<br>(Escamilla and Zavala, 2008) |
| X |   |   |   |   | <i>NRGN</i>   | (Schmidt-Kastner et al., 2020)                        |
|   |   |   |   | X | <i>NRXN1</i>  | (Abrahams et al., 2013)                               |
|   |   |   |   | X | <i>NRXN2</i>  | (Abrahams et al., 2013)                               |
|   |   |   |   | X | <i>NRXN3</i>  | (Abrahams et al., 2013)                               |
|   |   |   |   | X | <i>NSD1</i>   | (Abrahams et al., 2013)                               |
|   |   |   |   | X | <i>NSD2</i>   | (Abrahams et al., 2013)                               |
|   |   |   |   | X | <i>NTNG2</i>  | (Abrahams et al., 2013)                               |
|   |   |   |   | X | <i>NTRK2</i>  | (Abrahams et al., 2013)                               |
|   |   |   |   | X | <i>NUAK1</i>  | (Abrahams et al., 2013)                               |
|   |   |   |   | X | <i>NUDCD2</i> | (Abrahams et al., 2013)                               |
|   |   |   |   | X | <i>NUP155</i> | (Abrahams et al., 2013)                               |
|   |   |   |   | X | <i>OCRL</i>   | (Abrahams et al., 2013)                               |
|   | X |   |   |   | <i>ODZ4</i>   | (Kerner, 2014)                                        |
| X |   |   |   |   | <i>OGFOD2</i> | (Schmidt-Kastner et al., 2020)                        |
| X |   |   |   |   | <i>OPCML</i>  | (Schmidt-Kastner et al., 2020)                        |
|   |   |   |   | X | <i>OPHN1</i>  | (Abrahams et al., 2013)                               |
|   |   |   |   | X | <i>OR52M1</i> | (Abrahams et al., 2013)                               |
|   |   |   |   | X | <i>OTUD7A</i> | (Abrahams et al., 2013)                               |
| X | X |   |   |   | <i>OTUD7B</i> | (Schmidt-Kastner et al., 2020)                        |
|   |   |   |   | X | <i>OXTR</i>   | (Abrahams et al., 2013)                               |
|   |   |   |   | X | <i>P2RX5</i>  | (Abrahams et al., 2013)                               |
|   |   |   |   | X | <i>P4HA2</i>  | (Abrahams et al., 2013)                               |
|   |   |   |   | X | <i>PACS1</i>  | (Abrahams et al., 2013)                               |

|   |   |   |   |   |                |                                                      |
|---|---|---|---|---|----------------|------------------------------------------------------|
|   |   |   |   | X | <i>PACS2</i>   | (Abrahams et al., 2013)                              |
|   |   |   |   | X | <i>PAH</i>     | (Abrahams et al., 2013)                              |
|   |   |   |   | X | <i>PAK1</i>    | (Abrahams et al., 2013)                              |
|   |   |   |   | X | <i>PAK2</i>    | (Abrahams et al., 2013)                              |
|   |   |   |   | X | <i>PARD3B</i>  | (Abrahams et al., 2013)                              |
|   |   |   | X |   | <i>PARK2</i>   | (Hayman and Fernandez, 2018)                         |
|   |   |   |   | X | <i>PAX5</i>    | (Abrahams et al., 2013)                              |
| X |   |   |   | X | <i>PAX6</i>    | (Abrahams et al., 2013),<br>(Yoshikawa et al., 2021) |
|   |   |   |   | X | <i>PCCA</i>    | (Abrahams et al., 2013)                              |
|   |   |   |   | X | <i>PCCB</i>    | (Abrahams et al., 2013)                              |
|   |   |   |   | X | <i>PCDH19</i>  | (Abrahams et al., 2013)                              |
|   |   |   |   | X | <i>PCDH7</i>   | (Demontis et al., 2019)                              |
|   |   |   |   | X | <i>Pcdh9</i>   | (Marshall et al., 2008)                              |
|   |   | X |   |   | <i>PCLO</i>    | (Shadrina et al., 2018)                              |
|   | X |   |   |   | <i>PDE10A</i>  | (Kerner et al., 2011)                                |
| X |   |   |   |   | <i>PDE4B</i>   | (Liu et al., 2019)                                   |
|   |   |   | X |   | <i>PDE4D</i>   | (Hayman and Fernandez, 2018)                         |
|   |   |   |   | X | <i>PER2</i>    | (Abrahams et al., 2013)                              |
| X |   |   |   |   | <i>PGBD1</i>   | (Liu et al., 2019)                                   |
| X |   |   |   |   | <i>PGM3</i>    | (Schmidt-Kastner et al., 2020)                       |
|   |   |   |   | X | <i>PHB</i>     | (Abrahams et al., 2013)                              |
|   |   |   |   | X | <i>PHF12</i>   | (Abrahams et al., 2013)                              |
|   |   |   |   | X | <i>PHF2</i>    | (Abrahams et al., 2013)                              |
|   |   |   |   | X | <i>PHF21A</i>  | (Abrahams et al., 2013)                              |
|   |   |   |   | X | <i>PHF3</i>    | (Abrahams et al., 2013)                              |
|   |   |   |   | X | <i>PHF7</i>    | (Abrahams et al., 2013)                              |
|   |   |   |   | X | <i>PHF8</i>    | (Abrahams et al., 2013)                              |
|   |   |   |   | X | <i>PHIP</i>    | (Abrahams et al., 2013)                              |
|   |   |   |   | X | <i>PHRF1</i>   | (Abrahams et al., 2013)                              |
|   |   |   |   | X | <i>PIK3R2</i>  | (Abrahams et al., 2013)                              |
|   |   |   |   | X | <i>PLCB1</i>   | (Abrahams et al., 2013)                              |
|   |   |   |   | X | <i>PLXNA4</i>  | (Abrahams et al., 2013)                              |
|   |   |   |   | X | <i>PLXNB1</i>  | (Abrahams et al., 2013)                              |
|   |   |   | X |   | <i>POC1B</i>   | (Demontis et al., 2019)                              |
|   |   |   |   | X | <i>POGZ</i>    | (Abrahams et al., 2013)                              |
|   |   |   |   | X | <i>POMGNT1</i> | (Abrahams et al., 2013)                              |

|   |  |  |   |   |                             |                                |
|---|--|--|---|---|-----------------------------|--------------------------------|
|   |  |  |   | X | <i>PON1</i>                 | (Abrahams et al., 2013)        |
|   |  |  |   | X | <i>POU3F3</i>               | (Abrahams et al., 2013)        |
|   |  |  |   | X | <i>PPP1R9B</i>              | (Abrahams et al., 2013)        |
|   |  |  |   | X | <i>PPP2CA</i>               | (Abrahams et al., 2013)        |
| X |  |  |   |   | <i>PPP2R2A</i>              | (Schmidt-Kastner et al., 2020) |
|   |  |  |   | X | <i>PPP2R5D</i>              | (Abrahams et al., 2013)        |
|   |  |  |   | X | <i>PPP5C</i>                | (Abrahams et al., 2013)        |
|   |  |  |   | X | <i>PREX1</i>                | (Abrahams et al., 2013)        |
|   |  |  |   | X | <i>PRICKLE1</i>             | (Abrahams et al., 2013)        |
|   |  |  |   | X | <i>PRICKLE2</i>             | (Abrahams et al., 2013)        |
|   |  |  |   | X | <i>PRKCB</i>                | (Abrahams et al., 2013)        |
|   |  |  |   | X | <i>PRKD1</i>                | (Abrahams et al., 2013)        |
|   |  |  |   | X | <i>PRKD2</i>                | (Abrahams et al., 2013)        |
|   |  |  |   | X | <i>PRKN</i>                 | (Abrahams et al., 2013)        |
| X |  |  |   |   | <i>PRMT1</i>                | (Schmidt-Kastner et al., 2020) |
|   |  |  |   | X | <i>PRODH</i>                | (Abrahams et al., 2013)        |
|   |  |  |   | X | <i>PRR12</i>                | (Abrahams et al., 2013)        |
| X |  |  |   |   | <i>PRSS16/POM121<br/>L2</i> | (Liu et al., 2019)             |
|   |  |  |   | X | <i>PSMD12</i>               | (Abrahams et al., 2013)        |
|   |  |  |   | X | <i>PTCHD1</i>               | (Abrahams et al., 2013)        |
|   |  |  |   | X | <i>PTCHD1-AS</i>            | (Abrahams et al., 2013)        |
|   |  |  |   | X | <i>PTEN</i>                 | (Abrahams et al., 2013)        |
| X |  |  |   |   | <i>PTK2B</i>                | (Schmidt-Kastner et al., 2020) |
|   |  |  |   | X | <i>PTK7</i>                 | (Abrahams et al., 2013)        |
|   |  |  |   | X | <i>PTPN11</i>               | (Abrahams et al., 2013)        |
|   |  |  | X |   | <i>PTPRF</i>                | (Demontis et al., 2019)        |
|   |  |  |   | X | <i>PYHIN1</i>               | (Abrahams et al., 2013)        |
|   |  |  |   | X | <i>QRICH1</i>               | (Abrahams et al., 2013)        |
|   |  |  |   | X | <i>RAB2A</i>                | (Abrahams et al., 2013)        |
|   |  |  |   | X | <i>RAB43</i>                | (Abrahams et al., 2013)        |
|   |  |  |   | X | <i>RAC1</i>                 | (Abrahams et al., 2013)        |
|   |  |  |   | X | <i>RAD21</i>                | (Abrahams et al., 2013)        |
|   |  |  | X | X | <i>RAI1</i>                 | (Abrahams et al., 2013)        |
|   |  |  |   | X | <i>RALA</i>                 | (Abrahams et al., 2013)        |
| X |  |  |   |   | <i>RALGAPA2</i>             | (Schmidt-Kastner et al., 2020) |
|   |  |  |   | X | <i>RALGAPB</i>              | (Abrahams et al., 2013)        |



|   |   |  |   |   |                    |                                                                                 |
|---|---|--|---|---|--------------------|---------------------------------------------------------------------------------|
|   |   |  |   | X | <i>RANBP17</i>     | (Abrahams et al., 2013)                                                         |
| X |   |  |   |   | <i>RANGAP1</i>     | (Schmidt-Kastner et al., 2020)                                                  |
|   |   |  |   | X | <i>RBFOX1</i>      | (Abrahams et al., 2013)                                                         |
|   |   |  |   | X | <i>RBM27</i>       | (Abrahams et al., 2013)                                                         |
|   | X |  |   |   | <i>RBPJL</i>       | (Stahl et al., 2019)                                                            |
| X |   |  |   |   | <i>RELA</i>        | (Schmidt-Kastner et al., 2020)                                                  |
|   |   |  |   | X | <i>RELN</i>        | (Abrahams et al., 2013)                                                         |
|   |   |  |   | X | <i>RERE</i>        | (Abrahams et al., 2013)                                                         |
|   |   |  |   | X | <i>RFX3</i>        | (Abrahams et al., 2013)                                                         |
|   |   |  |   | X | <i>RHEB</i>        | (Abrahams et al., 2013)                                                         |
|   |   |  |   | X | <i>RHEBL1</i>      | (Charney et al., 2017), (McMahon and Detera-Wadleigh, 2020), (Hou et al., 2016) |
|   |   |  |   | X | <i>RIMS1</i>       | (Abrahams et al., 2013)                                                         |
|   |   |  |   | X | <i>RLIM</i>        | (Abrahams et al., 2013)                                                         |
|   | X |  |   |   | <i>RNA5SP223</i>   | (McMahon and Detera-Wadleigh, 2020)                                             |
|   | X |  |   |   | <i>RNU2-17P</i>    | (Stahl et al., 2019)                                                            |
|   | X |  |   |   | <i>RNU6-1028P</i>  | (Cichon et al., 2011), (McMahon and Detera-Wadleigh, 2020)                      |
|   | X |  |   |   | <i>RNU6-131P</i>   | (Stahl et al., 2019)                                                            |
|   |   |  |   | X | <i>ROBO2</i>       | (Abrahams et al., 2013)                                                         |
|   |   |  |   | X | <i>RORA</i>        | (Abrahams et al., 2013)                                                         |
|   |   |  |   | X | <i>RORB</i>        | (Abrahams et al., 2013)                                                         |
|   |   |  |   | X | <i>RPS10P2-AS1</i> | (Abrahams et al., 2013)                                                         |
|   | X |  |   |   | <i>RPS6KA2</i>     | (Kerner et al., 2011)                                                           |
| X |   |  |   |   | <i>RPTOR</i>       | (Schmidt-Kastner et al., 2020)                                                  |
|   |   |  |   | X | <i>RSRC1</i>       | (Abrahams et al., 2013)                                                         |
|   |   |  |   | X | <i>SAE1</i>        | (Abrahams et al., 2013)                                                         |
|   |   |  |   | X | <i>SATB1</i>       | (Abrahams et al., 2013)                                                         |
|   |   |  |   | X | <i>SBF1</i>        | (Abrahams et al., 2013)                                                         |
|   |   |  |   | X | <i>SCAF4</i>       | (Abrahams et al., 2013)                                                         |
|   |   |  |   | X | <i>SCN1A</i>       | (Abrahams et al., 2013)                                                         |
|   |   |  |   | X | <i>SCN2A</i>       | (Abrahams et al., 2013)                                                         |
|   | X |  |   |   | <i>SCN2A</i>       | (Stahl et al., 2019)                                                            |
|   |   |  |   | X | <i>SCN8A</i>       | (Abrahams et al., 2013)                                                         |
|   |   |  |   | X | <i>SCN9A</i>       | (Abrahams et al., 2013)                                                         |
|   |   |  |   | X | <i>SEMA5A</i>      | (Abrahams et al., 2013)                                                         |
|   |   |  | X |   | <i>SEMA6D</i>      | (Demontis et al., 2019)                                                         |

|   |   |   |   |   |                 |                                                                |
|---|---|---|---|---|-----------------|----------------------------------------------------------------|
| X |   |   |   |   | <i>SERPING1</i> | (Schmidt-Kastner et al., 2020)                                 |
|   |   |   |   | X | <i>SET</i>      | (Abrahams et al., 2013)                                        |
|   |   |   |   | X | <i>SETBP1</i>   | (Abrahams et al., 2013)                                        |
|   |   |   |   | X | <i>SETD1A</i>   | (Abrahams et al., 2013)                                        |
|   |   |   |   | X | <i>SETD2</i>    | (Abrahams et al., 2013)                                        |
|   |   |   |   | X | <i>SETD5</i>    | (Abrahams et al., 2013)                                        |
| X |   |   |   |   | <i>SF3B1</i>    | (Schmidt-Kastner et al., 2020)                                 |
|   |   |   |   | X | <i>SGSH</i>     | (Abrahams et al., 2013)                                        |
|   |   |   |   | X | <i>SHANK1</i>   | (Abrahams et al., 2013)                                        |
| X | X |   |   | X | <i>SHANK2</i>   | (Abrahams et al., 2013),<br>(Yoshikawa et al., 2021)           |
|   |   |   |   | X | <i>SHANK3</i>   | (Abrahams et al., 2013)                                        |
|   |   |   |   | X | <i>SHOX</i>     | (Abrahams et al., 2013)                                        |
|   |   |   |   | X | <i>SIK1</i>     | (Abrahams et al., 2013)                                        |
|   |   |   |   | X | <i>SIN3A</i>    | (Abrahams et al., 2013)                                        |
|   |   |   |   | X | <i>SKI</i>      | (Abrahams et al., 2013)                                        |
|   |   |   |   | X | <i>SLC12A5</i>  | (Abrahams et al., 2013)                                        |
|   |   |   |   | X | <i>SLC1A2</i>   | (Abrahams et al., 2013)                                        |
|   |   |   |   | X | <i>SLC35B1</i>  | (Abrahams et al., 2013)                                        |
|   |   |   |   | X | <i>SLC38A10</i> | (Abrahams et al., 2013)                                        |
|   |   |   |   | X | <i>SLC45A1</i>  | (Abrahams et al., 2013)                                        |
|   |   |   |   | X | <i>SLC6A1</i>   | (Abrahams et al., 2013)                                        |
|   |   | X |   |   | <i>SLC6A2</i>   | (Lohoff, 2010)                                                 |
|   |   | X | X | X | <i>SLC6A3</i>   | (Abrahams et al., 2013)                                        |
|   | X | X | X |   | <i>SLC6A4</i>   | (Escamilla and Zavala, 2008)                                   |
|   |   |   | X |   | <i>SLC6A9</i>   | (Demontis et al., 2019)                                        |
|   |   |   |   | X | <i>SLC7A3</i>   | (Abrahams et al., 2013)                                        |
|   |   |   |   | X | <i>SLC7A5</i>   | (Abrahams et al., 2013)                                        |
|   |   |   |   | X | <i>SLC9A6</i>   | (Abrahams et al., 2013)                                        |
|   |   |   |   | X | <i>SLITRK5</i>  | (Abrahams et al., 2013)                                        |
|   |   |   |   | X | <i>SMAD4</i>    | (Abrahams et al., 2013)                                        |
|   |   |   |   | X | <i>SMARCA2</i>  | (Abrahams et al., 2013)                                        |
|   |   |   |   | X | <i>SMARCA4</i>  | (Abrahams et al., 2013)                                        |
|   |   |   |   | X | <i>SMARCC2</i>  | (Abrahams et al., 2013)                                        |
|   |   |   |   | X | <i>SMC1A</i>    | (Abrahams et al., 2013)                                        |
|   | X |   |   |   | <i>SMNDC1</i>   | (Charney et al., 2017),<br>(McMahon and Detera-Wadleigh, 2020) |
|   |   |   | X |   | <i>SNAP25</i>   | (Mill et al., 2005)                                            |

|   |   |  |   |   |                  |                                                                |
|---|---|--|---|---|------------------|----------------------------------------------------------------|
| X |   |  |   |   | <i>SNAP91</i>    | (Christensen and Børglum, 2019)                                |
|   |   |  |   | X | <i>SNX14</i>     | (Abrahams et al., 2013)                                        |
|   |   |  |   | X | <i>SNX5</i>      | (Abrahams et al., 2013)                                        |
|   |   |  |   | X | <i>SON</i>       | (Abrahams et al., 2013)                                        |
|   | X |  |   |   | <i>SORCS1</i>    | (Charney et al., 2017),<br>(McMahon and Detera-Wadleigh, 2020) |
|   |   |  | X | X | <i>SORCS3</i>    | (Abrahams et al., 2013)                                        |
|   |   |  |   | X | <i>SOX5</i>      | (Abrahams et al., 2013)                                        |
|   |   |  |   | X | <i>SOX6</i>      | (Abrahams et al., 2013)                                        |
|   |   |  | X |   | <i>SPAG16</i>    | (Demontis et al., 2019)                                        |
|   |   |  |   | X | <i>SPARCL1</i>   | (Abrahams et al., 2013)                                        |
|   |   |  |   | X | <i>SPAST</i>     | (Abrahams et al., 2013)                                        |
|   |   |  |   | X | <i>SPEN</i>      | (Abrahams et al., 2013)                                        |
|   |   |  |   | X | <i>SRCAP</i>     | (Abrahams et al., 2013)                                        |
| X |   |  |   |   | <i>SREBF1</i>    | (Schmidt-Kastner et al., 2020)                                 |
| X |   |  |   |   | <i>SRPK2</i>     | (Schmidt-Kastner et al., 2020)                                 |
|   |   |  |   | X | <i>SRPRA</i>     | (Abrahams et al., 2013)                                        |
| X |   |  |   |   | <i>SRR</i>       | (Balu et al., 2013)                                            |
|   |   |  |   | X | <i>SRSF11</i>    | (Abrahams et al., 2013)                                        |
|   |   |  | X |   | <i>ST3GAL3</i>   | (Demontis et al., 2019)                                        |
|   |   |  |   | X | <i>ST8SIA2</i>   | (Abrahams et al., 2013)                                        |
|   |   |  |   | X | <i>STAG1</i>     | (Abrahams et al., 2013)                                        |
|   |   |  |   | X | <i>STXBP1</i>    | (Abrahams et al., 2013)                                        |
|   |   |  |   | X | <i>STXBP5</i>    | (Abrahams et al., 2013)                                        |
|   |   |  |   | X | <i>SUPT16H</i>   | (Abrahams et al., 2013)                                        |
|   |   |  |   | X | <i>SYN1</i>      | (Abrahams et al., 2013)                                        |
| X |   |  |   |   | <i>Syn3</i>      | (Chen et al., 2009)                                            |
|   | X |  |   |   | <i>SYNE1</i>     | (McMahon and Detera-Wadleigh, 2020)                            |
|   | X |  |   |   | <i>SYNE1-AS1</i> | (McMahon and Detera-Wadleigh, 2020)                            |
|   |   |  |   | X | <i>SYNGAP1</i>   | (Abrahams et al., 2013)                                        |
|   |   |  |   | X | <i>SYT1</i>      | (Abrahams et al., 2013)                                        |
|   |   |  | X |   | <i>SYT2</i>      | (Hayman and Fernandez, 2018)                                   |
|   |   |  |   | X | <i>TAF1</i>      | (Abrahams et al., 2013)                                        |
|   |   |  |   | X | <i>TAF6</i>      | (Abrahams et al., 2013)                                        |
|   |   |  |   | X | <i>TANC2</i>     | (Abrahams et al., 2013)                                        |
|   |   |  |   | X | <i>TAOK1</i>     | (Abrahams et al., 2013)                                        |

|   |   |   |   |   |                 |                                                          |
|---|---|---|---|---|-----------------|----------------------------------------------------------|
|   |   |   |   | X | <i>TAOK2</i>    | (Abrahams et al., 2013)                                  |
|   |   |   |   | X | <i>TBC1D23</i>  | (Abrahams et al., 2013)                                  |
|   |   |   |   | X | <i>TBC1D31</i>  | (Abrahams et al., 2013)                                  |
|   |   |   |   | X | <i>TBCK</i>     | (Abrahams et al., 2013)                                  |
|   |   |   |   | X | <i>TBL1XR1</i>  | (Abrahams et al., 2013)                                  |
|   |   |   |   | X | <i>TBR1</i>     | (Abrahams et al., 2013)                                  |
|   |   |   |   | X | <i>TBX1</i>     | (Abrahams et al., 2013)                                  |
|   |   |   |   | X | <i>TCF20</i>    | (Abrahams et al., 2013)                                  |
| X |   |   |   | X | <i>TCF4</i>     | (Abrahams et al., 2013)                                  |
|   |   |   |   | X | <i>TCF7L2</i>   | (Abrahams et al., 2013)                                  |
|   |   |   |   | X | <i>TEK</i>      | (Abrahams et al., 2013)                                  |
|   |   |   |   | X | <i>TERF2</i>    | (Abrahams et al., 2013)                                  |
|   |   |   |   | X | <i>TET2</i>     | (Abrahams et al., 2013)                                  |
|   |   |   |   | X | <i>TET3</i>     | (Abrahams et al., 2013)                                  |
|   |   | X |   |   | <i>TH</i>       | (Shadrina et al., 2018)                                  |
|   | X |   |   |   | <i>THSD7A</i>   | (Stahl et al., 2019)                                     |
|   |   |   |   | X | <i>TLK2</i>     | (Abrahams et al., 2013)                                  |
|   | X |   |   |   | <i>TLR9</i>     | (Chen et al., 2013), (McMahon and Detera-Wadleigh, 2020) |
|   |   |   |   | X | <i>TM4SF20</i>  | (Abrahams et al., 2013)                                  |
|   |   |   |   | X | <i>TM9SF4</i>   | (Abrahams et al., 2013)                                  |
|   | X |   |   |   | <i>TMEM151A</i> | (Stahl et al., 2019)                                     |
|   |   |   |   | X | <i>TMLHE</i>    | (Abrahams et al., 2013)                                  |
|   | X |   |   |   | <i>TMUB2</i>    | (Stahl et al., 2019)                                     |
|   |   |   |   | X | <i>TNRC6B</i>   | (Abrahams et al., 2013)                                  |
|   |   |   |   | X | <i>TOR3A</i>    | (LeDoux, 2012)                                           |
|   |   | X | X |   | <i>TPH1</i>     | (Palladino et al., 2019)                                 |
|   |   | X | X |   | <i>TPH2</i>     | (Palladino et al., 2019)                                 |
|   |   |   |   | X | <i>TRAF7</i>    | (Abrahams et al., 2013)                                  |
|   | X |   |   |   | <i>TRANK1</i>   | (Chen et al., 2013), (McMahon and Detera-Wadleigh, 2020) |
|   |   |   |   | X | <i>TRAPPC6B</i> | (Abrahams et al., 2013)                                  |
|   |   |   |   | X | <i>TRAPPC9</i>  | (Abrahams et al., 2013)                                  |
|   |   |   |   | X | <i>TRIM23</i>   | (Abrahams et al., 2013)                                  |
|   |   |   |   | X | <i>TRIO</i>     | (Abrahams et al., 2013)                                  |
|   |   |   |   | X | <i>TRIP12</i>   | (Abrahams et al., 2013)                                  |
|   |   |   |   | X | <i>TRPC6</i>    | (Abrahams et al., 2013)                                  |
|   |   |   |   | X | <i>TRPM1</i>    | (Abrahams et al., 2013)                                  |

|   |   |  |  |   |                |                                 |
|---|---|--|--|---|----------------|---------------------------------|
|   |   |  |  | X | <i>TSC1</i>    | (Abrahams et al., 2013)         |
|   |   |  |  | X | <i>TSC2</i>    | (Abrahams et al., 2013)         |
|   |   |  |  | X | <i>TSHZ3</i>   | (Abrahams et al., 2013)         |
| X |   |  |  |   | <i>TSNARE1</i> | (Christensen and Børglum, 2019) |
|   |   |  |  | X | <i>TTI2</i>    | (Abrahams et al., 2013)         |
|   |   |  |  | X | <i>UBE3A</i>   | (Abrahams et al., 2013)         |
|   |   |  |  | X | <i>UBE3C</i>   | (Abrahams et al., 2013)         |
|   |   |  |  | X | <i>UBN2</i>    | (Abrahams et al., 2013)         |
|   |   |  |  | X | <i>UBR1</i>    | (Abrahams et al., 2013)         |
|   |   |  |  | X | <i>UBR5</i>    | (Abrahams et al., 2013)         |
|   |   |  |  | X | <i>UNC79</i>   | (Abrahams et al., 2013)         |
|   |   |  |  | X | <i>UPF3B</i>   | (Abrahams et al., 2013)         |
|   |   |  |  | X | <i>USP15</i>   | (Abrahams et al., 2013)         |
|   |   |  |  | X | <i>USP45</i>   | (Abrahams et al., 2013)         |
|   |   |  |  | X | <i>USP7</i>    | (Abrahams et al., 2013)         |
|   |   |  |  | X | <i>USP9X</i>   | (Abrahams et al., 2013)         |
|   |   |  |  | X | <i>VAMP2</i>   | (Abrahams et al., 2013)         |
|   |   |  |  | X | <i>VEZF1</i>   | (Abrahams et al., 2013)         |
|   |   |  |  | X | <i>VIL1</i>    | (Abrahams et al., 2013)         |
|   |   |  |  | X | <i>VPS13B</i>  | (Abrahams et al., 2013)         |
|   |   |  |  | X | <i>WAC</i>     | (Abrahams et al., 2013)         |
|   |   |  |  | X | <i>WASF1</i>   | (Abrahams et al., 2013)         |
|   |   |  |  | X | <i>WDFY3</i>   | (Abrahams et al., 2013)         |
|   |   |  |  | X | <i>WDFY4</i>   | (Abrahams et al., 2013)         |
|   |   |  |  | X | <i>WDR26</i>   | (Abrahams et al., 2013)         |
|   |   |  |  | X | <i>WFDC5</i>   | (Stahl et al., 2019)            |
|   |   |  |  | X | <i>WWOX</i>    | (Abrahams et al., 2013)         |
|   |   |  |  | X | <i>XPC</i>     | (Abrahams et al., 2013)         |
|   |   |  |  | X | <i>YY1</i>     | (Abrahams et al., 2013)         |
|   |   |  |  | X | <i>ZBTB20</i>  | (Abrahams et al., 2013)         |
|   |   |  |  | X | <i>ZC3H4</i>   | (Abrahams et al., 2013)         |
|   | X |  |  |   | <i>ZCCHC2</i>  | (Stahl et al., 2019)            |
| X |   |  |  |   | <i>ZEB2</i>    | (Schmidt-Kastner et al., 2020)  |
|   |   |  |  | X | <i>ZMIZ1</i>   | (Abrahams et al., 2013)         |
|   |   |  |  | X | <i>ZMYM2</i>   | (Abrahams et al., 2013)         |
|   |   |  |  | X | <i>ZMYND11</i> | (Abrahams et al., 2013)         |

|   |  |  |  |   |                |                         |
|---|--|--|--|---|----------------|-------------------------|
|   |  |  |  | X | <i>ZMYND8</i>  | (Abrahams et al., 2013) |
|   |  |  |  | X | <i>ZNF292</i>  | (Abrahams et al., 2013) |
|   |  |  |  | X | <i>ZNF462</i>  | (Abrahams et al., 2013) |
| X |  |  |  | X | <i>ZNF804A</i> | (Abrahams et al., 2013) |
|   |  |  |  | X | <i>ZSWIM6</i>  | (Abrahams et al., 2013) |
